# Supplementary figures and images for: Human complex exploration strategies are enriched by noradrenaline-modulated heuristics
Source: eLife journal article supplement (doi:10.7554/elife.59907), 2021-01-04

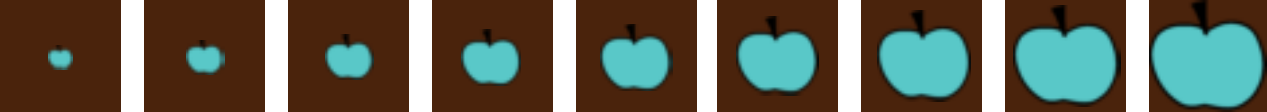

Supplement: supp [file elife-59907-supp-v1.zip]
